# Supplementary material
Source: PubMed Central journal article supplement (PMC7159270)
Supplement: mmc1.pdf [file mmc1.pdf]

# THE LANCET

## **Supplementary webappendix**

This webappendix formed part of the original submission. We post it as supplied by the authors.

Supplement to: Lee N, Hui DSC. Dexamethasone in community-acquired pneumonia. *Lancet* 2011; **378**: 979.

**Table: Reports on the impacts of corticosteroid use on viral shedding and clinical outcomes in severe influenza infection**

| Clinical reports                           | Findings                                                                                                             |
|--------------------------------------------|----------------------------------------------------------------------------------------------------------------------|
| Lee N et al. <sup>4</sup> (n=147)          | Seasonal influenza; slowed viral clearance                                                                           |
| Boudreault AA et al. (n=143)               | Seasonal influenza; slowed viral clearance                                                                           |
| Giannella M et al. (n=64)                  | 2009 A/H1N1 ; slowed viral clearance                                                                                 |
| Brun-Buisson C et al. <sup>3</sup> (n=208) | 2009 A/H1N1; increased mortality, increased secondary infections, longer duration of ventilation*                    |
| Kim SH et al. (n=245)                      | 2009 A/H1N1; increased mortality, increased secondary infections, longer duration of ventilation and ICU care        |
| Xi X et al. (n=155)                        | 2009 A/H1N1; increased mortality, increased secondary infections                                                     |
| Han Ke et al. (n=83)                       | 2009 A/H1N1; increased risk of progression to critical illness and death                                             |
| Viasus D et al. (n=197)                    | 2009 A/H1N1; no benefit in preventing progression, longer time to clinical stability, increased secondary infections |
| Martin-Loeches I et al. (n=220)            | 2009 A/H1N1; no benefit in preventing progression, increased secondary infections                                    |
| Liem NT et al. (n=67)                      | H5N1; increased mortality                                                                                            |
| Hien ND et al. (n=29)                      | H5N1; no benefit in preventing progression**                                                                         |

Literature search was performed using PubMed database with the search terms: "corticosteroids", "influenza"

\*corticosteroid initiated within the first 3 days of disease (before full viral suppression achieved) was associated with the worst outcomes

\*\*a trend towards increased mortality also reported. A controlled study on corticosteroids in H5N1 pneumonia using mouse model did not show inhibition of cytokine release nor survival benefit [Xu T, et al. *Eur Respir J.* 2009;33(4):852-60.]

Boudreault AA, et al. *Biol Blood Marrow Transplant.* 2011;17(7):979-86.

Giannella M, et al. *Clin Microbiol Infect.* 2010 Oct 14. doi: 10.1111/j.1469-0691.2010.03399.x.

Kim SH, et al. *Am J Respir Crit Care Med*. 2011;183(9):1207-1214.  
Xi X, et al. *BMC Infect Dis*. 2010;10:256.  
Han Ke, et al. *Clin Infect Dis*. 2011;53(4) :326-33.  
Viasus D, et al. *J Infect*. 2011;62(3):193-9.  
Martin-Loeches I, et al. *Intensive Care Med*. 2011;37(2):272-83.  
Liem NT, et al. *Clin Infect Dis*. 2009;48(12):1639-46.  
Hien ND, et al. *Emerg Infect Dis*. 2009;15(1):19-23.
